# Supplementary material for: κ-Selenocarrageenan Oligosaccharides Prepared by Deep-Sea Enzyme Alleviate Inflammatory Responses and Modulate Gut Microbiota in Ulcerative Colitis Mice
Source: MDPI journal article supplement (doi:10.3390/ijms24054672), 2023-02-28
Supplement: s1 [file s1]

Table S1 Molecular weight distribution of hydrolysis products

| Peak time (min) | Molecular weight (Da) | Proportion (%) |
|-----------------|-----------------------|----------------|
| 18.795          | 8217.73               | 2.54           |
| 23.239          | 1379.49               | 37.14          |
| 23.929          | 1045.64               | 8.23           |
| 24.544          | 816.82                | 31.69          |
| 26.191          | 421.59                | 5.25           |
| 27.322          | 267.70                | 15.15          |
