# Supplementary material for: κ-Selenocarrageenan Oligosaccharides Prepared by Deep-Sea Enzyme Alleviate Inflammatory Responses and Modulate Gut Microbiota in Ulcerative Colitis Mice
Source: Int J Mol Sci. 2023 Feb 28;24(5):4672. doi: 10.3390/ijms24054672 (PMC10003262; doi:10.3390/ijms24054672)
Supplement: Supplementary file 1 [file ijms-24-04672-s001.zip]

Archive with 7 entries (7 files):
- Figure caption.pdf
- Figure S1.tif
- Figure S2.tif
- Figure S3.tif
- Figure S4.tif
- Figure S5.tif
- Table S1.pdf
